# Supplementary material for: Antimicrobial Activities of Cysteine-rich Peptides Specific to Bacteriocytes of the Pea Aphid Acyrthosiphon pisum
Source: PubMed Central journal article supplement (PMC6594739; doi:10.1264/jsme2.me18148), 2019-03-21
Supplement: 34_155_s1.pdf [file 34_155_s1.pdf]

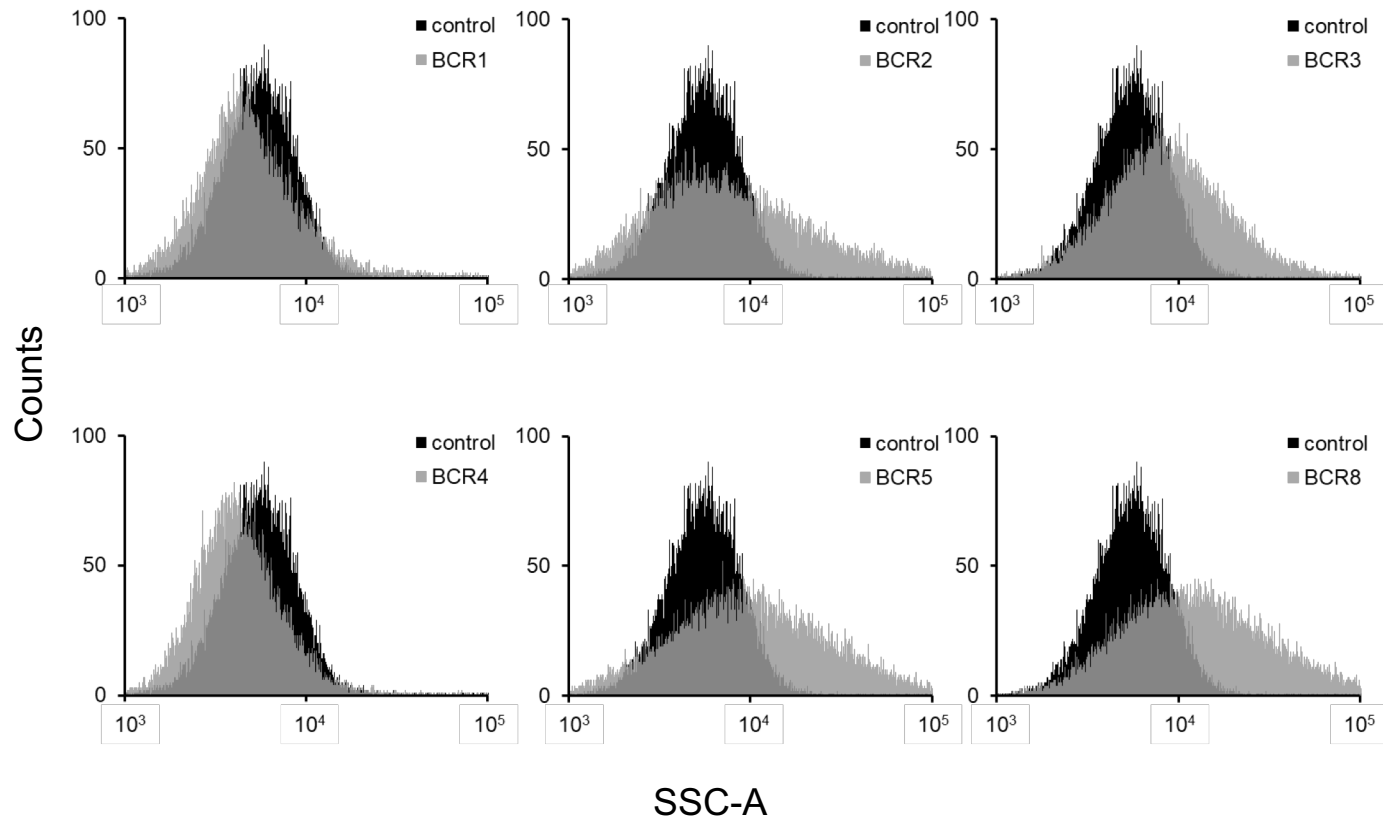

Fig. S1. Effects of BCR peptides on *E. coli* cells. *E. coli* MG1655 cells were treated for 3 h with 5  $\mu$ M BCR peptides or BSA as a control. Cells were stained with DAPI and PI, and analyzed by cell sorter. Histograms show side scatter (SSC).

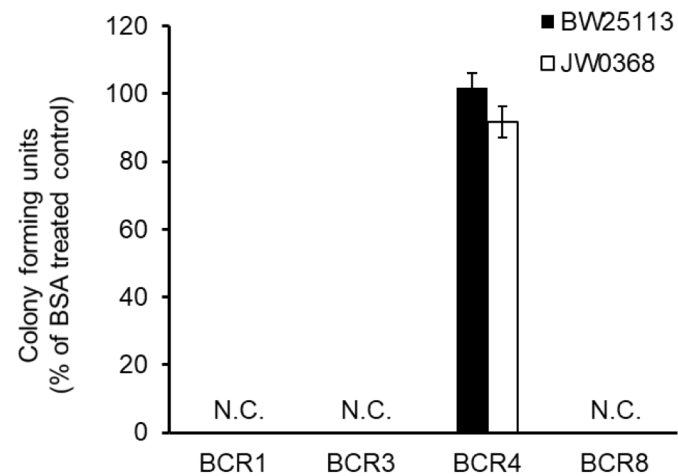

Fig. S2. Sensitivity of *E. coli sbmA* mutant to BCR peptides. After treatment with 5  $\mu$ M BCRs for 3 h, colony-forming units of *E. coli* BW25113 (wild type) and JW0368 (*sbmA* mutant) were estimated relative to BSA control. Each value is the mean  $\pm$  SE of three independent experiments. There were no significant difference between wild type and *bacA* mutant ( $P < 0.05$ , Student's *t*-test).

**A**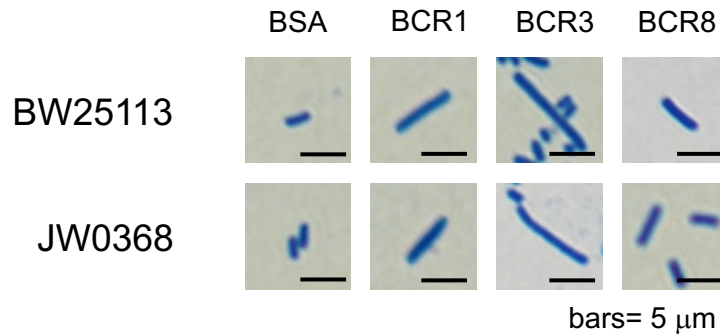**B**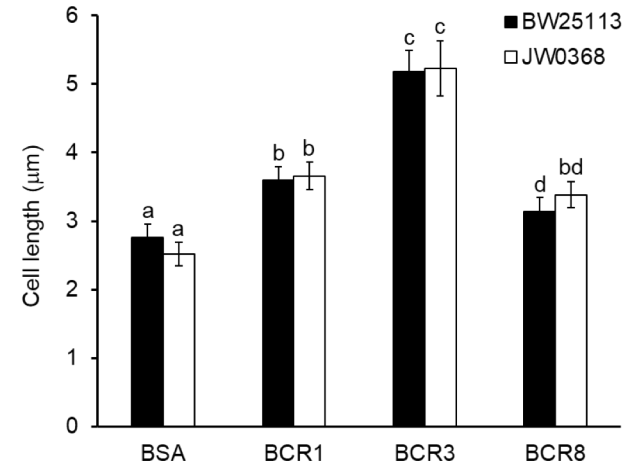

Fig. S3. (A) The cells of BW25113 and JW0368 were treated with 5 μM BCR peptides, fixed with methanol (Magee *et al.*, 1975) and stained with toluidine blue for 30 min. Images are representative micrographs of cells treated with each peptide. Scale bars, 5 μm. (B) The cell lengths of BW25113 and JW0368 were treated with BCR peptides. Means denoted by the same letter do not differ significantly ( $P < 0.05$ , Student's *t*-test).

Magee, C. M. *et al.*, 1975. A more reliable gram staining technic for diagnosis of surgical injections. *Am. J. Surg.* 130:341-346

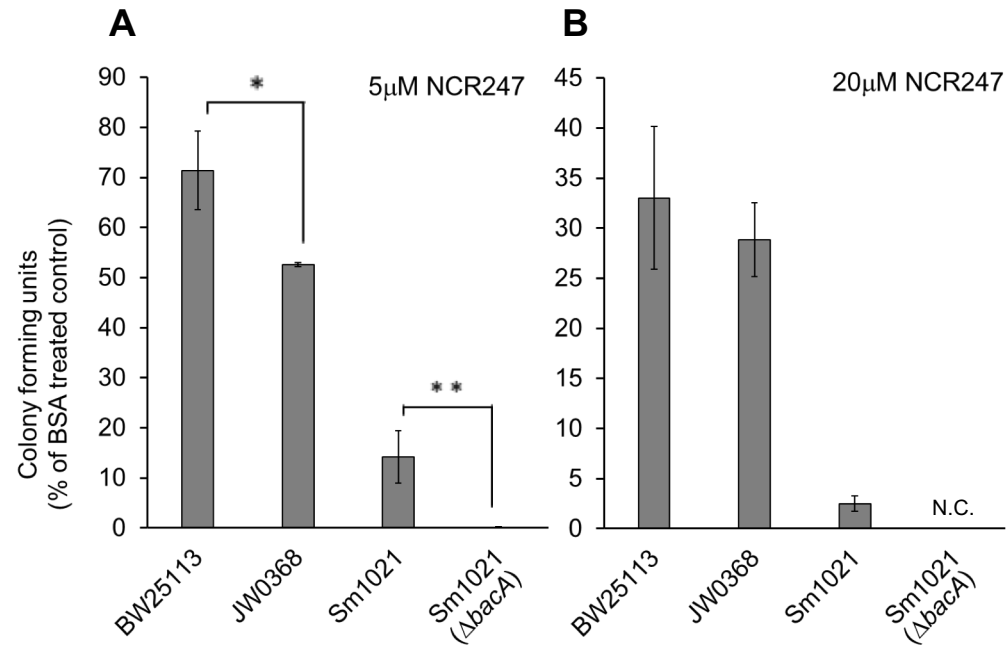

Fig. S4. Antimicrobial activity of NCR247 against *E. coli* and *S. meliloti*. After treatment with (A) 5 μM or (B) 20 μM NCR247 for 3 h, colony-forming units of each strain were estimated relative to BSA control. The dataset shown is representative of trends observed in three independent experiments. Each value is the mean ± SE of three independent experiments. Asterisks indicate significant difference between NCR247 treated cells and control (\*,  $P < 0.05$  by Student's *t*-test; \*\*,  $P < 0.001$  by Student's *t*-test). N.C., no colony appeared.

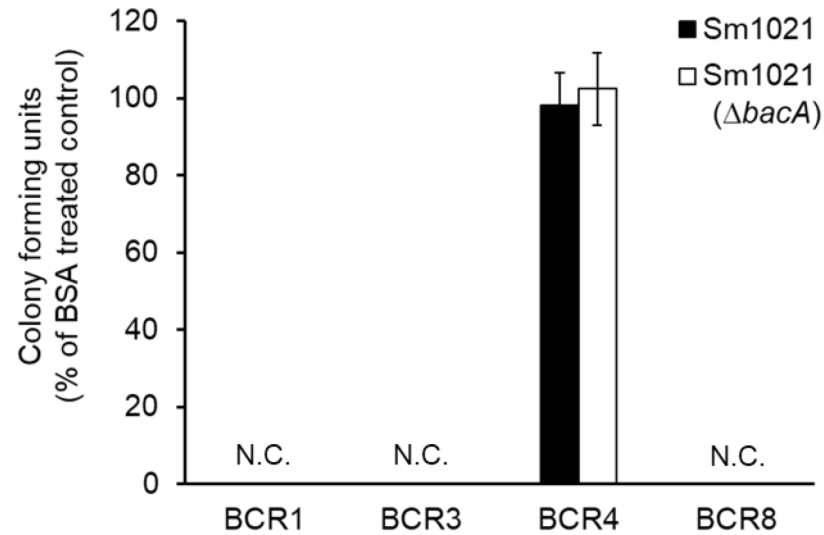

Fig. S5. Sensitivity of *S. meliloti bacA* mutant to BCR peptides. After treatment with 5  $\mu$ M BCRs for 3 h, colony-forming units of *S. meliloti* 1021 (wild type) and the *bacA* mutant were estimated relative to BSA control. Each value is the mean  $\pm$  SE of three independent experiments. There were no significant difference between wild type and *bacA* mutant ( $P < 0.05$ , Student's *t*-test).

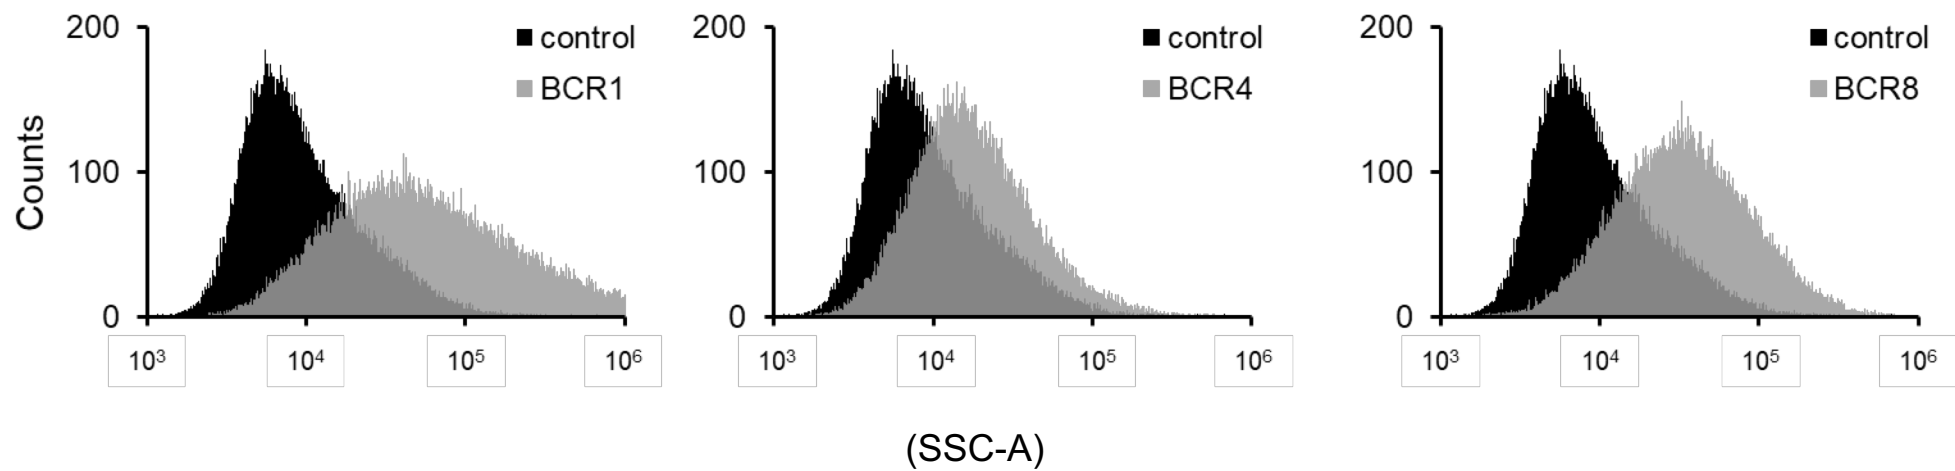

Fig. S6. Effects of BCR peptides on *S. meliloti* 1021. *Sinorhizobium meliloti* 1021 cells were treated for 3 h with 5  $\mu$ M BCR peptide or BSA as a control. Cells were stained with DAPI and PI, and analyzed by cell sorter. Histograms show side scatter (SSC) respectively.

Table S1. Activities of BCR peptides or NCR247 on *E. coli* and *S. meliloti* cells.

|                           | test                   | BCR1 | BCR2 | BCR3 | BCR4 | BCR5 | BCR8 | NCR247         |
|---------------------------|------------------------|------|------|------|------|------|------|----------------|
| <b><i>E. coli</i></b>     | Antibacterial activity | +    | -    | +    | ±    | +    | +    | +              |
|                           | Cell length            | ±    | +    | +    | -    | +    | +    | +              |
|                           | DAPI Fluorescence      | +    | +    | +    | -    | +    | +    | +              |
|                           | PI Fluorescence        | +    | +    | +    | -    | +    | +    | +              |
| <b><i>S. meliloti</i></b> | Antibacterial activity | +    | n.d. | +    | -    | n.d. | +    | + <sup>1</sup> |
|                           | Cell length            | +    | n.d. | n.d. | ±    | n.d. | +    | + <sup>2</sup> |
|                           | DAPI Fluorescence      | +    | n.d. | n.d. | ±    | n.d. | +    | n.d.           |
|                           | PI Fluorescence        | +    | n.d. | n.d. | ±    | n.d. | +    | + <sup>2</sup> |

+, obvious change; ±, slight change; -, not detectable. n.d., no data.

#### References

1. Haag *et al.*, 2012. Role of cysteine residues and disulfide bonds in the activity of a legume root nodule-specific, cysteine-rich peptide. *J. Biol. Chem.* 287:10791-10798
2. Van de Velde *et al.* 2010. Plant peptides govern terminal differentiation of bacteria in symbiosis. *Science.* 327:1122–1126

Table S2. Activities of BCR peptides or NCR247 on *sbmA/bacA* mutant cells compared with the wild-type strains.

|                                                          | test                   | BCR1 | BCR3 | BCR4 | BCR8 | NCR247 |
|----------------------------------------------------------|------------------------|------|------|------|------|--------|
| <b><i>E. coli</i></b><br>JW0368<br>( <i>sbmA</i> mutant) | Antibacterial activity | +    | +    | -    | -    | +      |
|                                                          | Cell length            | -    | -    | -    | -    | -      |
| <b><i>S. meliloti</i></b><br>Sm1021<br>$\Delta bacA$     | Antibacterial activity | +    | +    | -    | +    | +      |
|                                                          | Cell length            | -    | -    | -    | -    | -      |

+, more sensitive; -, no significant difference compared with the wild-type. Each strain was treated with 3  $\mu$ M of BCR1, BCR3, BCR8 or 5  $\mu$ M of BCR4, or 5  $\mu$ M of NCR247.
